# Supplementary material
Source: publisher site journal article supplement (https://www.dovepress.com/article/134382)
Supplement: Supplementary file 1 [file get_supplementary_file.php]

## Supplementary materials

Figure S1 PRISMA flow diagram

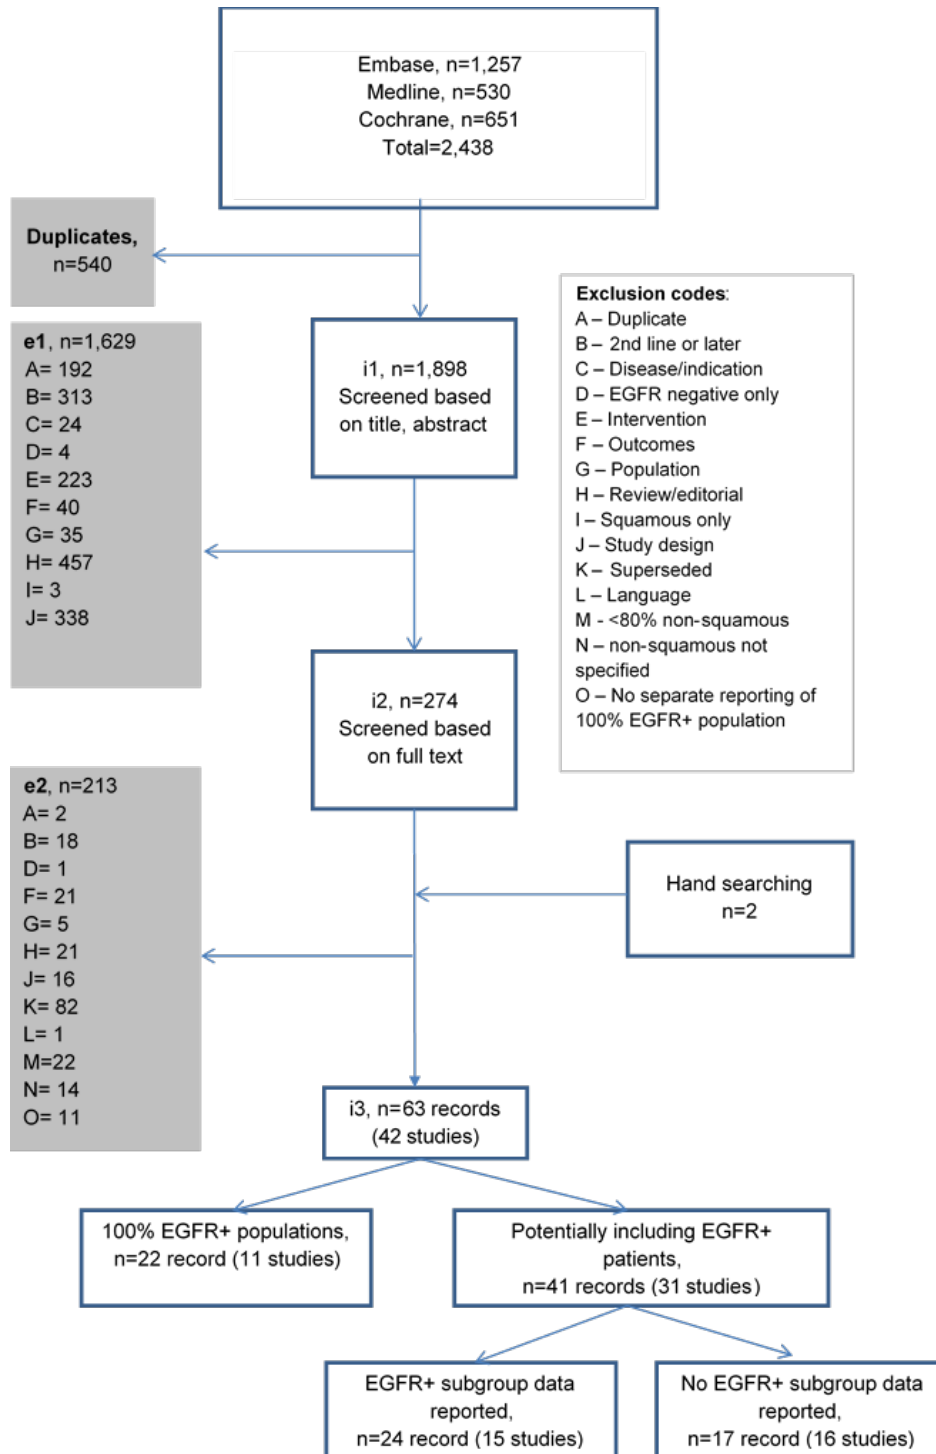

**Abbreviations:** EGFR, epidermal growth factor receptor mutation; EGFR+, epidermal growth factor receptor mutation positive.

**Table S1** Eligibility criteria for study inclusion in the clinical SR

| Criterion           | Description                                                                                                                                                                                                                                                                                                                                                                                                                                                                                                                                                                                                                                                                                                                                                            |
|---------------------|------------------------------------------------------------------------------------------------------------------------------------------------------------------------------------------------------------------------------------------------------------------------------------------------------------------------------------------------------------------------------------------------------------------------------------------------------------------------------------------------------------------------------------------------------------------------------------------------------------------------------------------------------------------------------------------------------------------------------------------------------------------------|
| Population          | <p>Treatment-naïve adults with locally advanced or metastatic (Stage IIIb or IV) non-squamous epidermal growth factor receptor mutation positive (EGFR+) NSCLC.</p> <p>Publications that do not explicitly state whether the enrolled patients have squamous or non-squamous histology were tagged and details of the citations provided to Roche. Studies where &gt;80% of enrolled patients present with non-squamous histology were eligible for inclusion.</p> <p>Where the study enrolled a mixed population with regard to stage of disease and the results for the metastatic NSCLC population were not reported separately, at least 80% of the enrolled patients had to present with locally advanced or metastatic disease to be eligible for inclusion.</p> |
| Interventions       | <p>Restricted to TKIs only.</p> <p>Studies included at least one study arm examining the following treatments:</p> <ul style="list-style-type: none"> <li>• Afatinib</li> <li>• Erlotinib</li> <li>• Gefitinib</li> <li>• Dacomitinib</li> </ul> <p>[No restriction on dose/treatment regimen and TKI may be administered as monotherapy or in combination with another agent(s)]</p>                                                                                                                                                                                                                                                                                                                                                                                  |
| Comparators         | Included immunotherapy, targeted therapies and chemotherapy                                                                                                                                                                                                                                                                                                                                                                                                                                                                                                                                                                                                                                                                                                            |
| Outcomes            | <p>Efficacy</p> <ul style="list-style-type: none"> <li>• OS</li> <li>• PFS</li> <li>• TTP</li> <li>• Response rates (CR, PR and SD)</li> </ul> <p>Safety</p> <ul style="list-style-type: none"> <li>• All-grade and grade 3/4 AEs</li> </ul> <p>Health-related quality of life (HRQoL)</p>                                                                                                                                                                                                                                                                                                                                                                                                                                                                             |
| Study design        | RCTs with no restriction on study design or phase.                                                                                                                                                                                                                                                                                                                                                                                                                                                                                                                                                                                                                                                                                                                     |
| Countries           | No restriction                                                                                                                                                                                                                                                                                                                                                                                                                                                                                                                                                                                                                                                                                                                                                         |
| Language            | English: English abstracts of foreign publications were considered                                                                                                                                                                                                                                                                                                                                                                                                                                                                                                                                                                                                                                                                                                     |
| Date of publication | No restriction                                                                                                                                                                                                                                                                                                                                                                                                                                                                                                                                                                                                                                                                                                                                                         |
| Publication status  | Published studies and unpublished data were considered                                                                                                                                                                                                                                                                                                                                                                                                                                                                                                                                                                                                                                                                                                                 |

**Abbreviations:** AE, adverse event; CR, complete response; EGFR, epidermal growth factor receptor; EGFR+, epidermal growth factor receptor mutation positive; HRQoL, health-related quality of life; NSCLC, non-small cell lung cancer; OS, overall survival; PFS, progression-free survival; PR, partial response; RCT, randomized controlled trial; SR, systematic review; SD, stable disease; TKI, tyrosine kinase inhibitors; TTP, time to progression.

**Figure S2** Graphical representation of risk of bias assessment of studies included in NMA

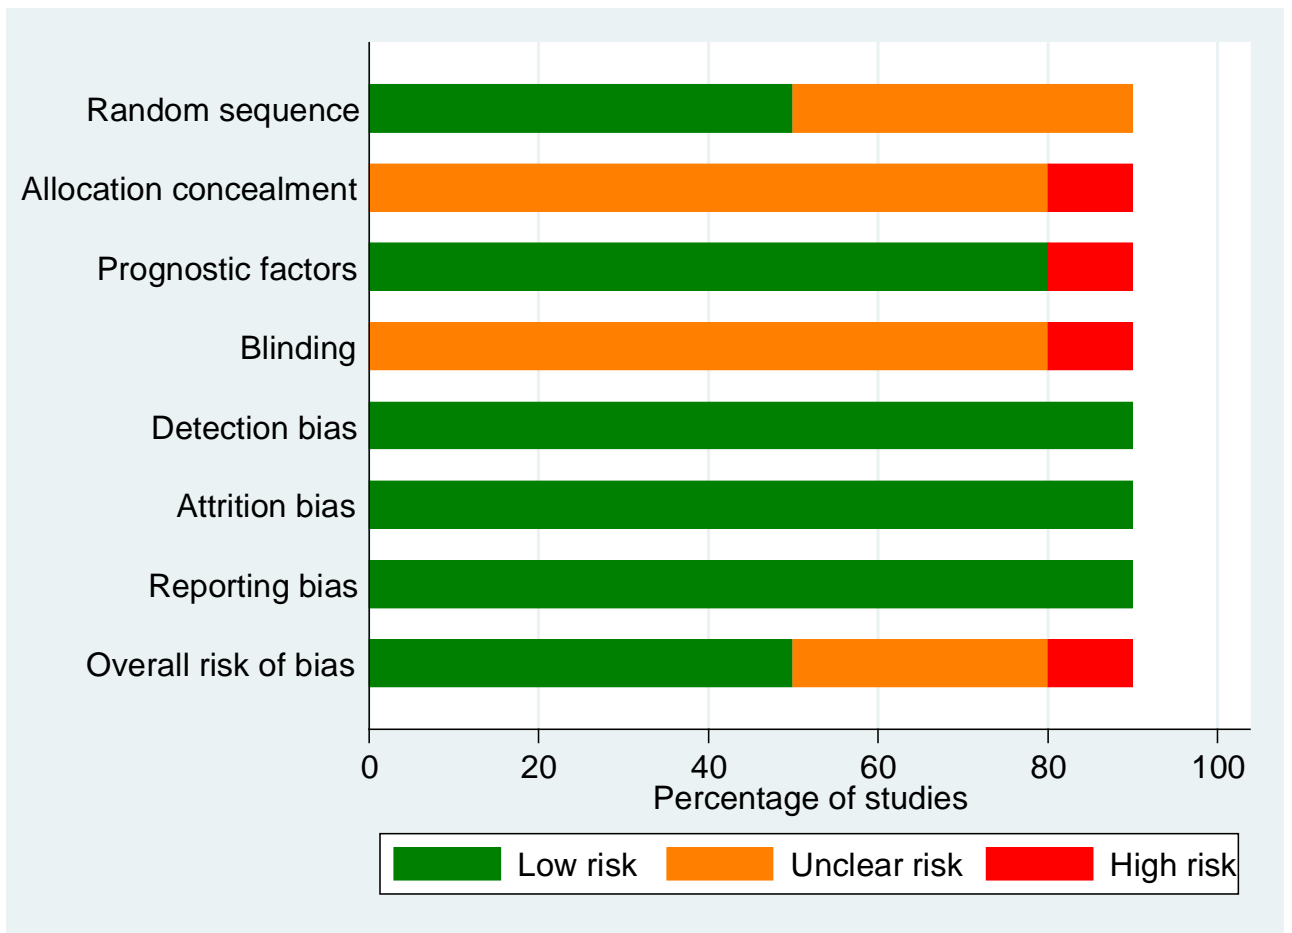

**Table S2** Trial-level data reported for PFS and obtained by modeling pseudo-IPD using the PH and AFT models

| Trial                          | Treatment               | Published HR (95% CI) | HR (95% CI) modeling IPD | 1/AF HR (95% CI)  |
|--------------------------------|-------------------------|-----------------------|--------------------------|-------------------|
| LUX-Lung 6 <sup>12,13,34</sup> | Afatinib                | 0.28 (0.20, 0.39)     | 0.27 (0.20, 0.37)        | 0.44 (0.38, 0.52) |
|                                | Chemotherapy            | comparator            | comparator               | comparator        |
| LUX-Lung 3 <sup>14,15,34</sup> | Afatinib                | 0.58 (0.43, 0.78)     | 0.58 (0.44, 0.78)        | 0.67 (0.54, 0.83) |
|                                | Chemotherapy            | comparator            | comparator               | comparator        |
| LUX-Lung 7 <sup>16</sup>       | Afatinib                | 0.73 (0.57, 0.95)     | 0.73 (0.56, 0.94)        | 0.79 (0.66, 0.96) |
|                                | Gefitinib               | comparator            | comparator               | comparator        |
| EURTAC <sup>5</sup>            | Erlotinib               | 0.37 (0.25, 0.54)     | 0.38 (0.26, 0.56)        | 0.49 (0.36, 0.65) |
|                                | Chemotherapy            | comparator            | comparator               | comparator        |
| ENSURE <sup>8</sup>            | Erlotinib               | 0.42 (0.27, 0.66)     | 0.40 (0.26, 0.62)        | 0.59 (0.47, 0.75) |
|                                | Chemotherapy            | comparator            | comparator               | comparator        |
| OPTIMAL <sup>10,11,33</sup>    | Erlotinib               | 0.16 (0.10, 0.26)     | 0.18 (0.12, 0.28)        | 0.36 (0.45, 0.29) |
|                                | Chemotherapy            | comparator            | comparator               | comparator        |
| JO25567 <sup>19</sup>          | Erlotinib               | comparator            | comparator               | comparator        |
|                                | Erlotinib + bevacizumab | 0.54 (0.36, 0.79)     | 0.54 (0.36, 0.80)        | 0.53 (0.38, 0.72) |
| WTJOG3405 <sup>7,31</sup>      | Gefitinib               | 0.520 (0.378, 0.715)  | 0.49 (0.35, 0.66)        | 0.60 (0.47, 0.75) |
|                                | Chemotherapy            | comparator            | comparator               | comparator        |
| NEJ002 <sup>9,32</sup>         | Gefitinib               | 0.322 (0.236, 0.438)  | 0.29 (0.22, 0.40)        | 0.46 (0.39, 0.54) |
|                                | Chemotherapy            | comparator            | comparator               | comparator        |

**Abbreviations:** AF, acceleration factor; AFT, acceleration failure time; AIC, Akaike information criterion; BIC, Bayesian information criterion; CI, confidence interval; HR, hazard ratio; IPD, individual patient data; PFS, progression-free survival; PH, proportional hazards.

**Table S3** Treatment comparisons for PFS: 1/AF (95% CrI), random-effect model

| Treatment A             | Treatment B                        |                                    |                                    |                                    |                                    | SUCRA |
|-------------------------|------------------------------------|------------------------------------|------------------------------------|------------------------------------|------------------------------------|-------|
|                         | Chemotherapy                       | Afatinib                           | Erlotinib                          | Erlotinib + bevacizumab            | Gefitinib                          |       |
| Chemotherapy            |                                    | <b>1.99</b><br><i>(1.27, 3.08)</i> | <b>2.15</b><br><i>(1.40, 3.26)</i> | <b>4.06</b><br><i>(1.70, 9.56)</i> | <b>1.81</b><br><i>(1.15, 2.81)</i> | 0.00  |
| Afatinib                | <b>0.50</b><br><i>(0.33, 0.79)</i> |                                    | 1.08<br>(0.59, 1.99)               | 2.04<br>(0.77, 5.39)               | 0.91<br>(0.55, 1.52)               | 0.50  |
| Erlotinib               | <b>0.47</b><br><i>(0.31, 0.71)</i> | 0.93<br>(0.50, 1.70)               |                                    | 1.89<br>(0.89, 4.01)               | 0.84<br>(0.46, 1.56)               | 0.75  |
| Erlotinib + bevacizumab | <b>0.25</b><br><i>(0.10, 0.59)</i> | 0.49<br>(0.19, 1.29)               | 0.53<br>(0.25, 1.13)               |                                    | 0.44<br>(0.17, 1.18)               | 1.00  |
| Gefitinib               | <b>0.55</b><br><i>(0.36, 0.87)</i> | 1.10<br>(0.66, 1.83)               | 1.19<br>(0.64, 2.19)               | 2.25<br>(0.85, 5.93)               |                                    | 0.25  |

**Notes:** Results that do not include the null value are bold and italicized. Comparisons of row versus column.

**Abbreviations:** CrI, credible interval; HR, hazard ratio; PFS, progression-free survival; SUCRA, surface under cumulative ranking curve.

**Table S4** Treatment comparisons for PFS: HR (95% CrI), fixed-effect model

| Treatment A             | Treatment B                        |                                    |                                    |                                    |                                    | SUCRA |
|-------------------------|------------------------------------|------------------------------------|------------------------------------|------------------------------------|------------------------------------|-------|
|                         | Chemotherapy                       | Afatinib                           | Erlotinib                          | Erlotinib + bevacizumab            | Gefitinib                          |       |
| Chemotherapy            |                                    | <b>2.65</b><br><i>(2.20, 3.19)</i> | <b>3.26</b><br><i>(2.54, 4.19)</i> | <b>6.05</b><br><i>(3.79, 9.62)</i> | <b>2.21</b><br><i>(1.84, 2.66)</i> | 0.00  |
| Afatinib                | <b>0.38</b><br><i>(0.31, 0.45)</i> |                                    | 1.23<br>(0.90, 1.68)               | <b>2.28</b><br><i>(1.38, 3.76)</i> | 0.83<br>(0.69, 1.01)               | 0.50  |
| Erlotinib               | <b>0.31</b><br><i>(0.24, 0.39)</i> | 0.81<br>(0.59, 1.11)               |                                    | <b>1.85</b><br><i>(1.25, 2.74)</i> | <b>0.68</b><br><i>(0.50, 0.93)</i> | 0.75  |
| Erlotinib + bevacizumab | <b>0.17</b><br><i>(0.10, 0.26)</i> | <b>0.44</b><br><i>(0.27, 0.73)</i> | <b>0.54</b><br><i>(0.36, 0.80)</i> |                                    | <b>0.37</b><br><i>(0.22, 0.60)</i> | 1.00  |
| Gefitinib               | <b>0.45</b><br><i>(0.38, 0.54)</i> | 1.20<br>(0.99, 1.46)               | <b>1.48</b><br><i>(1.08, 2.01)</i> | <b>2.73</b><br><i>(1.66, 4.51)</i> |                                    | 0.25  |

**Notes:** Results that do not include the null value are bold and italicized. Comparisons of row versus column.

**Abbreviations:** CrI, credible interval; HR, hazard ratio; PFS, progression-free survival; SUCRA, surface under cumulative ranking curve.

**Table S5** Treatment comparisons for PFS: 1/AF (95% CrI), fixed-effect model for individual chemotherapy regimens

| Treatment A             | Treatment B                        |                                    |                                    |                                    |                                    |                                    | SUCRA |
|-------------------------|------------------------------------|------------------------------------|------------------------------------|------------------------------------|------------------------------------|------------------------------------|-------|
|                         | Cisplatin + gemcitabine            | Afatinib                           | Erlotinib                          | Gefitinib                          | Cisplatin + docetaxel              | Erlotinib + bevacizumab            |       |
| Cisplatin + gemcitabine |                                    | <b>2.20</b><br><i>(1.88, 2.57)</i> | <b>1.79</b><br><i>(1.46, 2.21)</i> | <b>1.68</b><br><i>(1.35, 2.1)</i>  | <b>0.95</b><br><i>(0.74, 1.22)</i> | <b>3.39</b><br><i>(2.34, 4.93)</i> | 0.20  |
| Afatinib                | <b>0.45</b><br><i>(0.39, 0.53)</i> |                                    | 0.81<br>(0.64, 1.03)               | <b>0.77</b><br><i>(0.64, 0.91)</i> | <b>0.43</b><br><i>(0.34, 0.55)</i> | <b>1.54</b><br><i>(1.04, 2.28)</i> | 0.80  |
| Erlotinib               | <b>0.56</b><br><i>(0.45, 0.69)</i> | 1.23<br>(0.97, 1.55)               |                                    | 0.94<br>(0.73, 1.21)               | <b>0.53</b><br><i>(0.42, 0.67)</i> | <b>1.89</b><br><i>(1.39, 2.57)</i> | 0.60  |
| Gefitinib               | <b>0.59</b><br><i>(0.48, 0.74)</i> | <b>1.31</b><br><i>(1.09, 1.56)</i> | 1.06<br>(0.83, 1.37)               |                                    | <b>0.56</b><br><i>(0.46, 0.69)</i> | <b>2.01</b><br><i>(1.35, 3.00)</i> | 0.40  |
| Cisplatin + docetaxel   | <b>1.05</b><br><i>(0.82, 1.36)</i> | <b>2.32</b><br><i>(1.82, 2.96)</i> | <b>1.89</b><br><i>(1.49, 2.41)</i> | <b>1.77</b><br><i>(1.44, 2.19)</i> |                                    | <b>3.57</b><br><i>(2.41, 5.29)</i> | 0.00  |
| Erlotinib + bevacizumab | <b>0.30</b><br><i>(0.20, 0.43)</i> | <b>0.65</b><br><i>(0.44, 0.96)</i> | <b>0.53</b><br><i>(0.39, 0.72)</i> | <b>0.50</b><br><i>(0.33, 0.74)</i> | <b>0.28</b><br><i>(0.19, 0.41)</i> |                                    | 1.00  |

**Notes:** Results that do not include the null value are bold and italicized. Comparisons of row versus column.

**Abbreviations:** AF, acceleration factor; CrI, credible interval; PFS, progression-free survival; SUCRA, surface under cumulative ranking curve.

**Table S6** Summary of the PFS NMA results and trial-level data (base case) for the treatment comparisons with trial-level data available

| Trial                          | Treatment comparison                 | 1/AF (95% CI)     | FE NMA results based on AFs, 1/AF (95% CrI) | Trial quality assessment- overall risk of bias |
|--------------------------------|--------------------------------------|-------------------|---------------------------------------------|------------------------------------------------|
| LUX-Lung 6 <sup>12,13,34</sup> | Afatinib vs chemotherapy             | 0.44 (0.38, 0.52) | 0.48 (0.43, 0.54)                           | Low                                            |
| LUX-Lung 3 <sup>14,15,34</sup> | Afatinib vs chemotherapy             | 0.67 (0.54, 0.83) |                                             | Low                                            |
| LUX-Lung 7 <sup>16</sup>       | Afatinib vs chemotherapy             | 0.79 (0.66, 0.96) |                                             | Unclear                                        |
| EURTAC <sup>5</sup>            | Erlotinib vs chemotherapy            | 0.49 (0.36, 0.65) | 0.46 (0.40, 0.53)                           | Low                                            |
| ENSURE <sup>8</sup>            | Erlotinib vs chemotherapy            | 0.59 (0.47, 0.75) |                                             | Unclear                                        |
| OPTIMAL <sup>10,11,33</sup>    | Erlotinib vs chemotherapy            | 0.36 (0.29, 0.45) |                                             | Low                                            |
| WTJOG3405 <sup>7,31</sup>      | Gefitinib vs chemotherapy            | 0.60 (0.47, 0.75) | 0.53 (0.48, 0.60)                           | Unclear                                        |
| NEJ002 <sup>9,32</sup>         | Gefitinib vs chemotherapy            | 0.46 (0.39, 0.54) |                                             | Low                                            |
| JO25567 <sup>19</sup>          | Erlotinib + bevacizumab vs erlotinib | 0.53 (0.38, 0.72) | 0.53 (0.39, 0.72)                           | Low                                            |

**Abbreviations:** AF, acceleration factor; CI, confidence interval; CrI, credible interval; FE, fixed-effects; NMA, network meta-analysis.

**Table S7** Treatment comparisons of 1/AF (95% CrI) for PFS: fixed-effect model for Asian populations

| Treatment A             | Treatment B                        |                                    |                                    |                                    |                                    | SUCRA |
|-------------------------|------------------------------------|------------------------------------|------------------------------------|------------------------------------|------------------------------------|-------|
|                         | Chemotherapy                       | Afatinib                           | Erlotinib                          | Erlotinib + bevacizumab            | Gefitinib                          |       |
| Chemotherapy            |                                    | <b>2.26</b><br><i>(1.92, 2.67)</i> | <b>2.19</b><br><i>(1.86, 2.58)</i> | <b>4.14</b><br><i>(2.92, 5.87)</i> | <b>2.00</b><br><i>(1.75, 2.30)</i> | 0.75  |
| Afatinib                | <b>0.44</b><br><i>(0.37, 0.52)</i> |                                    | 0.97<br>(0.77, 1.22)               | <b>1.83</b><br><i>(1.24, 2.7)</i>  | 0.89<br>(0.71, 1.10)               | 0.50  |
| Erlotinib               | <b>0.46</b><br><i>(0.39, 0.54)</i> | 1.03<br>(0.82, 1.30)               |                                    | <b>1.89</b><br><i>(1.39, 2.57)</i> | 0.91<br>(0.74, 1.13)               | 1.00  |
| Erlotinib + bevacizumab | <b>0.24</b><br><i>(0.17, 0.34)</i> | <b>0.55</b><br><i>(0.37, 0.80)</i> | <b>0.53</b><br><i>(0.39, 0.72)</i> |                                    | <b>0.48</b><br><i>(0.33, 0.70)</i> | 0.25  |
| Gefitinib               | <b>0.50</b><br><i>(0.44, 0.57)</i> | 1.13<br>(0.91, 1.40)               | 1.10<br>(0.89, 1.35)               | <b>2.07</b><br><i>(1.42, 3.01)</i> |                                    | 0.75  |

**Notes:** Results that do not include the null value are bold and italicized. Comparisons of row versus column.

**Abbreviations:** AF, acceleration factor; CrI, credible interval; PFS, progression-free survival; SUCRA; surface under cumulative ranking curve.
